# Supplementary material for: Proteomic Characterization of Virulence Factors and Related Proteins in Enterococcus Strains from Dairy and Fermented Food Products
Source: MDPI journal article supplement (doi:10.3390/ijms231810971), 2022-09-19
Supplement: s1 [file s1]

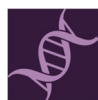

Article

# Proteomic Characterisation of Virulence Factors and Related Proteins in *Enterococcus* Strains from Dairy and Fermented Food Products

Ana G. Abril <sup>1,2</sup>, Marcos Quintela-Baluja <sup>3</sup>, Tomás G. Villa <sup>1</sup>, Pilar Calo-Mata <sup>3</sup>, Jorge Barros-Velázquez <sup>3</sup> and M. Carrera <sup>2,\*</sup>

<sup>1</sup> Department of Microbiology and Parasitology, Faculty of Pharmacy, University of Santiago de Compostela, 15898 Santiago de Compostela, Spain

<sup>2</sup> Department of Food Technology, Spanish National Research Council (CSIC), Marine Research Institute (IIM), 36208 Vigo, Spain

<sup>3</sup> Department of Analytical Chemistry, Nutrition and Food Science, Food Technology Division, School of Veterinary Sciences, University of Santiago de Compostela, Campus Lugo, 27002, Lugo, Spain

\* Correspondence: mcarrera@iim@csic.es

## 1. Supplemental Data 1

**Table S1.** Peptides corresponding to bacterial resistance to antibiotics and other toxic substances, identified in the *Enterococcus* strains analyzed.

| Function              | Protein                                       | Sequence                    | Strain |
|-----------------------|-----------------------------------------------|-----------------------------|--------|
| Antibiotic resistance | TetR family transcriptional regulator         | IETTSEMINQK                 | F1     |
|                       | TetR family transcriptional regulator         | EEVM*DAVIM*RVVEK            | F15    |
|                       | TetR family transcriptional regulator         | DVLEVIYAVLNAETIK            | F2     |
|                       | N-acetyltransferase domain-containing protein | SLGYARQTVAKLTADLLAEGK       | F7     |
|                       | PadR domain-containing protein                | DLMDGFYKGDE                 | F3     |
|                       | GNAT family acetyltransferase                 | GLGRKM*LGDGMTK              | F1     |
|                       | GNAT family N-acetyltransferase               | KAKEMNVSQIDLHVFAHNK         | F3     |
|                       | GNAT family acetyltransferase                 | QEVHDHEDVYKVYNQFAKENH GALQR | F13    |
|                       | Cass2 domain-containing protein               | TYKSDVEHYRK                 | F15    |
|                       | MarR family transcriptional regulator         | M*NEHDIGMLIKQLYDAKEK        | F16    |
|                       | MarR family transcriptional regulator         | M*ENQM*NEQFMK               | F5     |
|                       | Penicillin-binding protein2B                  | M*NNAYELNTVFIK              | F10    |
|                       | Penicillin-binding protein t                  | EITENALGTITSAPGSVVK         | F9     |
|                       | Penicillin-binding protein                    | VDKDDSTYSFSYK               | F3     |
|                       | Daunorubicin resistance protein DrrC          | DVSTRIPQGVMTVISGPAGSGK      | F7     |
|                       | OmpR/PhoB-type domain-containing protein      | EVTKILSM*IDQKDHLIR          | F7     |

|                                       |                                       |                                     |     |
|---------------------------------------|---------------------------------------|-------------------------------------|-----|
|                                       | PASTA domain-containing protein       | KETTPKQTAPEPASVNVSK                 | F9  |
|                                       | vanY D-Ala-D-Ala carboxypeptidase     | LDKRVVGEYQK                         | F3  |
|                                       | vanY D-Ala-D-Ala carboxypeptidase     | NGVSEEDAIAEVK                       | F1  |
|                                       | vanY D-Ala-D-Ala carboxypeptidase     | IDNDFSVVTPK                         | F1  |
|                                       | vanY D-Ala-D-Ala carboxypeptidase     | SVAAQQEVFSTNVNSLMSSEGLSEADAIK<br>TK | F9  |
| Additional resistances and tolerances | Cold shock-like protein CspD          | GFGFITTEGGEDIFVHFSAIQGDGFK          | F2  |
|                                       | Cold-shock protein (CspA)             | TLEEGQSVSFDVEDSDRGPQAVNVEKN         | F1  |
|                                       | General stress protein                | LVNSDDVTSGINTEVGK                   | F1  |
|                                       | CsbD-like protein                     | EGFEDLKDKFSK                        | F15 |
|                                       | YitT family protein                   | MAPVLMVAVTGR                        | F2  |
|                                       | Tellurite resistance protein TelA     | TQDDLIETIQETLR                      | F13 |
|                                       | MerR family transcriptional regulator | KLQFYTAKITAQQDSFGWTFEEAER           | F5  |
|                                       | MerR family transcriptional regulator | IVQLQKALNPK                         | F15 |
|                                       | SugE protein                          | DKQSFVLLM*LTFGSSFLFLFLAM*K          | F3  |
|                                       | Chaperone protein DnaK                | AAVEANDIELMKEKR                     | F5  |
|                                       | Chaperone protein DnaK                | DAEANAADKLR                         | F3  |

M\* methionine oxidation; C\* carbamidomethylation of Cys.

**Table S2.** Peptides corresponding to antibacterial compounds and proteins involved in antibacterial production, identified in the *Enterococcus* strains analyzed.

| Function                | Protein                                                              | Sequence                     | Strain |
|-------------------------|----------------------------------------------------------------------|------------------------------|--------|
| Antimicrobial compounds | Lantibiotic biosynthesis protein                                     | VEDADVEDDC*LC*HGNYGNK        | F13    |
|                         | Type 2 lantipeptide synthetase LanM                                  | FLSILDYPYYLMDQNHVELILEKNLSKK | F11    |
|                         | LanM family lanthionine synthetase                                   | YINDLKNQNSNK                 | F5     |
|                         | Thiopeptide-type bacteriocin biosynthesis domain protein             | DSTIKNLESIM*RSLLSNVEYTGYSR   | F13    |
|                         | Bacteriocin Protein                                                  | M*VEAAAQRGYIYKK              | F2     |
|                         | Radical SAM additional 4Fe4S-binding SPASM domain-containing protein | KVVFTGGEIGLTHDSLK            | F1     |

M\* methionine oxidation; C\* carbamidomethylation of Cys.

**Table S3.** Peptides corresponding to bacterial toxicity, identified in the *Enterococcus* strains analyzed.

| Function | Protein                                               | Sequence          | Strain |
|----------|-------------------------------------------------------|-------------------|--------|
| Toxin    | Type II toxin-antitoxin system PemK/MazF family toxin | VNVPKQGDILLNNAAPR | F1     |
|          | Type II toxin-antitoxin system RelE/ParE family toxin | KDGTSEFEEFLNSIPEK | F3     |
|          | Addiction module toxin RelE O                         | ETEVNGM*LVAQRLK   | F5     |

|  |                                                          |                             |     |
|--|----------------------------------------------------------|-----------------------------|-----|
|  | Toxin-antitoxin system, antitoxin component, AbrB family | SRLQGNSVVVTLPADHGK          | F13 |
|  | Toxin PIN                                                | KVEKENFLDR                  | F14 |
|  | Exfoliative toxin A/B                                    | KHFLKIPIPIC*GM*ILGLASLGNLFK | F15 |
|  | Prevent-host-death family antitoxin (Phd antitoxin)      | STEATTEELKC*GNDHSDYR        | F15 |
|  | LXG domain-containing protein                            | ISSGGKLTGDGLK               | F5  |
|  | LXG domain-containing protein                            | SLESVSDDLDSVK               | F13 |

M\* methionine oxidation; C\* carbamidomethylation of Cys.

**Table S4.** Peptides corresponding to proteins involved in host colonization and immune evasion, identified in the *Enterococcus* strains analyzed.

| Function                                | Protein                                          | Sequence                            | Strain |
|-----------------------------------------|--------------------------------------------------|-------------------------------------|--------|
| Colonization and immune evasion factors | Internalin                                       | EVVEAKEEVDEPTTGVEGSKAEVK            | F5     |
|                                         | Sortase                                          | TVDDVTQSIHIQNDK                     | F5     |
|                                         | LPXTG cell wall anchor domain-containing protein | DAQNQLSNGAK                         | F3     |
|                                         | LPXTG cell wall anchor domain-containing protein | AEVGFYAPTNGESDKNDTVSNEGTISPNTNTQ GK | F3     |
|                                         | LPXTG cell wall anchor domain-containing protein | MVGM*LMLVLMIPTVC*HAQETETQTIR        | F3     |
|                                         | LPXTG cell wall anchor domain-containing protein | LTSAYPAQRNARNVIK                    | F5     |
|                                         | LPXTG cell wall anchor domain-containing protein | TGETANIALSVLGSLMVLGSGIIFKK          | F13    |
|                                         | LPXTG cell wall anchor domain-containing protein | IVTM*PIILTIPK                       | F14    |
|                                         | LPXTG cell wall anchor domain-containing protein | FTLPDKVTIGLEEKDAVYLIVETK            | F15    |
|                                         | LPXTG cell wall anchor domain-containing protein | MHTEEIETANWAEIK                     | F1     |
|                                         | LPXTG cell wall anchor domain-containing protein | ENLLLD SKM*R                        | F2     |
|                                         | LPXTG cell wall anchor domain-containing protein | DPDENLAAGQTITIPKGNETLYAVWKK         | F2     |
|                                         | LPXTG cell wall anchor domain-containing protein | NTNSKQSSDSKASFNHPSTFFNNNK           | F13    |
|                                         | LPXTG cell wall anchor domain-containing protein | VELYTYDAQTK                         | F14    |

|                                                            |                                 |     |
|------------------------------------------------------------|---------------------------------|-----|
| LPXTG cell wall anchor domain-containing protein           | ETMEFLFEFLVDGC*KLAGKGLSFSEWLQAK | F16 |
| Adhesin BspA                                               | EM*FKEM*SNLTSLDVSSFDTSK         | F3  |
| Adhesin BspA                                               | GASETLSATVSPVDATDK              | F2  |
| Adhesin BspA                                               | TIPISMNGVVTPGTSSGK              | F5  |
| Adhesin BspA                                               | ADYC*TAC*GALKEYAPNFVENGITNKEC*K | F9  |
| Fibronectin/fibrinogen-binding protein                     | EKVFEILSM*TSEINGK               | F15 |
| Collagen-binding protein                                   | GFKITLIGTYQSNM*TK               | F16 |
| Ig domain-containing protein                               | MNKTIATLTVGATETLSATVSPETATDKSVK | F2  |
| DUF4097 domain-containing protein                          | GDLLIQQM*DAAM*LEITGTNNEIELRK    | F1  |
| Cell surface protein                                       | LAASSEDNLNIEIAM*PK              | F1  |
| Flagellar hook-associated protein 2                        | NFDQVASLLGGEDGLAAK              | F5  |
| Fn3_like domain-containing protein                         | NDGEIAGKESVLVFRLLGGAVIQR        | F15 |
| Fimbrial isopeptide formation D2 domain-containing protein | NITATFNVKIGR                    | F3  |
| Fimbrial isopeptide formation D2 domain-containing protein | KLADIPSIGDRSLIR                 | F5  |
| Fimbrial isopeptide formation D2 domain-containing protein | VHVYPKNELPTNDVKFIK              | F9  |
| Fimbrial isopeptide formation D2 domain-containing protein | GFKNEANVDNGHTVVK                | F1  |
| SpaA domain-containing protein                             | TAGGDEDKAK                      | F16 |
| Endopeptidase NlpC/P60 family protein                      | ALIDTLGSLPASQDPAPPEAR           | F13 |
| Endopeptidase NlpC/P60 family protein                      | ADLNRQKAEAEAEQAR                | F1  |
| M20/M25/M40 family peptidase                               | SLEDGKM*HAC*GHDAHTAM*LLTAAR     | F11 |
| M20 peptidase                                              | VGESGLSVTIGKAGK                 | F15 |
| Peptidase_M78                                              | IIFGAGDSIKVLK                   | F2  |
| Peptidase M28                                              | LVTEVVARLDNEALAEIK              | F2  |
| Peptidase T                                                | TIVEIIKENAKFQK                  | F2  |
| DD-transpeptidase                                          | IAGSALHNITNRGGLQGGLTQQLIK       | F3  |
| Peptidase                                                  | GISMNKQSSTPLGGLGRGSDK           | F12 |
| Dipeptidase PepV                                           | GSSDDKGPTMAAAYYGLK              | F13 |
| Dipeptidase PepV                                           | GSSDDKGPTM*AAYYGLK              | F16 |
| C-terminal processing peptidase                            | IQNENNLPATGALDDK                | F5  |
| Endopeptidase La                                           | MDFKGVYVM*SVEK                  | F5  |
| Peptidase_S8                                               | M*SDSLNQYYFAFGM*GMVLYVLSHFVKKSR | F5  |
| Dipeptidyl aminopeptidase                                  | ILGGGMSPEDFLK                   | F5  |
| Peptidase U32                                              | SIHYVSTVSNVYKAAVDSYM*EDPENYVC*K | F15 |
| Peptidase S74                                              | QAGEQAQAAAEQASSDAQAAK           | F13 |

|                                                   |                               |     |
|---------------------------------------------------|-------------------------------|-----|
| Peptidase, M24 family                             | KVGLIGWKMFTAK                 | F13 |
| Proline dipeptidase                               | FEALNGFLPGTDFSLDITPVIQK       | F5  |
| Oligoendopeptidase PepF/M3 family protein         | LSTYKLHGITDFLQKPLEYNRLQK      | F16 |
| Peptidase C51                                     | EGIAAILGNYSVESGINPK           | F16 |
| Peptidase_S9 domain-containing protein            | ILGGGMSPEDFIK                 | F5  |
| ImmA/IrrE family metallo-endopeptidase            | LKSLM*AYPINALSERK             | F15 |
| ImmA/IrrE family metallo-endopeptidase            | TEIVLELLRSNK                  | F13 |
| Isoaspartyl dipeptidase                           | ETLDIDTVIAKGEIM*VQEK          | F2  |
| Isoaspartyl dipeptidase                           | GGTIDFTASEDPDFWEK             | F3  |
| Signal peptidase I                                | YIGYFISFMK                    | F7  |
| Signal peptidase I                                | NVLLAILALFSLWFLFNIR           | F5  |
| Signal peptidase I                                | DSNDSLPEIQWIEK                | F1  |
| Immune inhibitor A                                | LDNPATGTPAATGPVK              | F2  |
| ClpA protease                                     | TEVTVQLSKALGIELLR             | F11 |
| ClpC protease                                     | M*GVNETSNASQGTGSRR            | F5  |
| Zinc protease                                     | DPEINEANLNLLK                 | F15 |
| Capsular polysaccharide biosynthesis protein CpsC | KRWLLILATTLAGFALAAGVTFFLITPK  | F13 |
| Capsular polysaccharide biosynthesis protein CpsC | MEEMVSLGEMFILLKKR             | F16 |
| N-acetylmuramoyl-L-alanine amidase                | AFGDQKKVNLETK                 | F2  |
| LysM domain protein                               | ILKVLAIGITVGGM*ALAIHTEK       | F9  |
| LysM domain protein                               | KKILVGALVALFFMPTAVLAAK        | F13 |
| Hemolysin III family channel protein              | SKKFTHVIWHLFVILGALLM*FFAVYLY  | F16 |
| Autolysin modifier protein                        | M*NIGSGASVVANNNGTAR           | F1  |
| Mga domain-containing protein                     | YDGKIWLLNDNNKR                | F5  |
| Mga domain-containing protein                     | LLQM*NERLIFQYC*MLLRVIFIK      | F9  |
| Mga domain-containing protein                     | KYDLIITNVSKPNAYRSVK           | F4  |
| Mga domain-containing protein                     | AYPENEREIIISGILLSSQRAR        | F9  |
| Mga domain-containing protein                     | QVIDWSWELHYC*EKTVIQK          | F1  |
| Mga domain-containing protein                     | SEFSKEVNQLYSPLIQELR           | F1  |
| Mga domain-containing protein                     | MNFFSILDKNTQTQLTILENIYISK     | F1  |
| Mga domain-containing protein                     | KAVYPLENGIALATVSPK            | F16 |
| Mga domain-containing protein                     | FNIIIAFIDHLK                  | F13 |
| Mga domain-containing protein                     | DIHPEHESIMLRAGKINLENISATLDEYR | F7  |
| Mga domain-containing protein                     | QLIFPKTNSSFVEQLKQLR           | F13 |
| Toxin secretion/phage lysis holin                 | KVM*ILFVVAVSVK                | F4  |

|  |                                                                                                   |                                |     |
|--|---------------------------------------------------------------------------------------------------|--------------------------------|-----|
|  | Type VII secretion protein EssC                                                                   | QIENSFDDVNKALRANIPAGMTGTR      | F5  |
|  | Type VII secretion effector                                                                       | IAQAVFLASSNLQSVAK              | F11 |
|  | Type VII secretion protein EssC                                                                   | DQVLNSLYQILK                   | F13 |
|  | LysR family transcriptional regulator                                                             | IAIGGGETQAFSFLAARLNELQQK       | F15 |
|  | LytR_cpsA_psr domain-containing protein                                                           | LIIVFLVLLMGIVSAGTAYAIR         | F3  |
|  | LytR_cpsA_psr domain-containing protein                                                           | IDFTLDGIHVAKGKQTLDEK           | F13 |
|  | LytTR family transcriptional regulator                                                            | YQISRFAETQMAGINIIM*KNGLTDYVSR  | F3  |
|  | HTH-type transcriptional regulator KdgR                                                           | FLNGRYGNM*SQETK                | F1  |
|  | ArpU family transcriptional regulator                                                             | MLLFPKIDRK                     | F2  |
|  | Competence protein ComEA helix-hairpin-helix repeat region                                        | LIEEQGKLTEELAKSIQK             | F3  |
|  | Control of competence regulator ComK, YlbF/YmcA                                                   | ALQEAYSNVKANEEAHALFK           | F5  |
|  | Regulatory protein YlbF                                                                           | M*IAVIVNEELFQLEDQC*LRVAEM*IKK  | F9  |
|  | Spore coat protein                                                                                | MENVLC*C*DQIKC*LVGETVKVNL      | F2  |
|  | Sporulation protein YjcZ                                                                          | MGLGGNGGGEAGQAGK               | F7  |
|  | Restriction endonuclease type IV, Mrr                                                             | NKSLYFERMQM*IDM*IR             | F13 |
|  | SfiI restriction endonuclease                                                                     | IVMGEVYVIPVYEYDDQAM*INNQVKFKSR | F12 |
|  | Type-2 restriction enzyme                                                                         | VYANVEAM*KIELNINLSLIGSQNVEK    | F9  |
|  | O-antigen ligase                                                                                  | MLVWQAIYLLVVFQIGK              | F7  |
|  | Methyl-accepting chemotaxis protein (MCP) signalling domain                                       | STESKLKSMAELPAM*K              | F14 |
|  | N-acetylglucosamine-6-phosphate deacetylase                                                       | M*GATTPADILGEKKIGK             | F1  |
|  | Glycosyl/glycerophosphate transferases involved in teichoic acid biosynthesis TagF/TagB/EpsJ/RodC | FVQVVEAGEHTVQNM*LK             | F9  |

M\* methionine oxidation; C\* carbamidomethylation of Cys.

**Table S5.** Peptides corresponding to transporters associated to virulence factors, identified in the *Enterococcus* strains analyzed.

| Function         | Protein                                        | Sequence                 | Strain |
|------------------|------------------------------------------------|--------------------------|--------|
| ABC transporters | Copper ABC transporter permease                | YANNNTLLMDGFTGIKYNISK    | F2     |
|                  | Copper ABC transporter permease                | APTPM*QYLVIILLVSGEAIINTR | F11    |
|                  | Ferrichrome transport ATP-binding protein PhuC | DTGEIYLDHNEVKAWKSNEKAK   | F13    |

|  |                                                                           |                                  |     |
|--|---------------------------------------------------------------------------|----------------------------------|-----|
|  | Cobalt ABC transporter permease                                           | TKISEWIAALK                      | F1  |
|  | Lantibiotic protection ABC transporter ATP-binding subunit                | ERLGIGLALVGNPK                   | F13 |
|  | Multidrug ABC transporter ATP-binding protein                             | AGEITTANLRR                      | F3  |
|  | Multidrug ABC transporter ATP-binding protein                             | SNMQWIWR                         | F2  |
|  | Multidrug ABC transporter ATP-binding protein                             | DADKILYM*QDGDIK                  | F3  |
|  | Spermidine/putrescine ABC transporter-binding protein                     | EVMGLSLNSLGYSLSKNNQELR           | F5  |
|  | Glycine betaine ABC transporter                                           | EMQDELLELQAKVKK                  | F1  |
|  | Glycine betaine/L-proline ABC transporter ATP-binding protein             | RPLIDFLDENVMVIGK                 | F5  |
|  | Peptide ABC transporter substrate-binding protein                         | AMRMADSQEDAK                     | F1  |
|  | Peptide ABC transporter peptide-binding protein                           | LDEVKTNVVK                       | F2  |
|  | Peptide ABC transporter substrate-binding protein                         | WKTLLQKADQLVAEEAPLVPLYQLTEAR     | F5  |
|  | Peptide ABC transporter substrate-binding protein                         | TDGLSIGYLSFNVK                   | F7  |
|  | Peptide ABC transporter ATP-binding protein                               | M*KKVLLNVQGLK                    | F13 |
|  | His/Glu/Gln/Arg/opine family amino ABC transporter, permease, 3-TM region | IPDLIMNLKNNK                     | F1  |
|  | Amino acid ABC transporter amino acid-binding/permease                    | IM*VPSFVNQFVITLK                 | F1  |
|  | Amino acid ABC transporter amino acid-binding/permease                    | DTTIISAIGVVELLQTGK               | F1  |
|  | Branched-chain amino acid ABC transporter substrate-binding protein       | FTAGDKDYQAM*LTKVK                | F2  |
|  | Amino acid ABC transporter ATP-binding protein                            | ALAMKPDVMLFDEPTSALDPEMVGEVLGVMQR | F5  |
|  | Amino acid ABC transporter ATP-binding protein                            | ASYTEKAVALAK                     | F15 |
|  | Amino acid ABC transporter substrate-binding protein                      | VGTSAEFAPFEFHTLIDGKDK            | F16 |
|  | Excinuclease ABC subunit A                                                | LALDNGAKHNPK                     | F2  |

|                                                                               |                                      |     |
|-------------------------------------------------------------------------------|--------------------------------------|-----|
| Sulfate ABC transporter ATP-binding protein                                   | LPTGNFIPNTDYQAM*YDDATREVKISGILR      | F2  |
| C4-dicarboxylate ABC transporter                                              | DMETYFGQDENK                         | F4  |
| Multiple sugar ABC transporter substrate-binding protein                      | AITVPLKSTGQAQMANFVVSNTSK             | F5  |
| Sugar ABC transporter permease                                                | NTALFAFTVVPISLFLSLGIAWVIFEKVK        | F7  |
| Sugar ABC transporter                                                         | ALGDNMGVAAAYPTIDFGSGAKQMKAFLGVK      | F9  |
| Carbohydrate ABC transporter substrate-binding protein                        | DGGKTETITFINHKTDWETNGK               | F14 |
| Sugar ABC transporter permease                                                | STIIIM*LIM*KVGSILTTGFDQIYLM*TNQLNR   | F15 |
| Sugar ABC transporter permease                                                | VGYASAASMVLFFILLLLGLAQMKLGGGKND<br>V | F16 |
| ABC transporter domain-containing protein                                     | M*RIEVD AISYAYDKNK                   | F1  |
| ABC transporter-like protein                                                  | GRTTLVIAHRLSTIVDADK                  | F2  |
| ABC transporter permease                                                      | RSALTM*FGIVIGIAAVIAILSIGRAFER        | F2  |
| ABC transporter permease                                                      | GKVATVISGVAVLALIAAATLGAGQSSAK        | F2  |
| ABC transporter domain-containing protein                                     | M*GMFQRMSANDWQK                      | F2  |
| ABC transporter domain-containing protein                                     | NLSGGQRQRVALAR                       | F2  |
| ABC transporter ATP-binding protein                                           | IM*ALNSSISYM*LMR                     | F4  |
| Basic membrane protein (BMP) family ABC transporter substrate-binding protein | GVGTAVQDIANR                         | F2  |
| ABC transporter ATP-binding protein                                           | KYVIDDLNLAIK                         | F2  |
| ABC transporter domain-containing protein                                     | FGKQEV LKGIDLDVGK                    | F1  |
| ABC transporter substrate-binding protein                                     | DM*AEALGIDPESIKEPA                   | F1  |
| ABC transporter, ATP-binding protein                                          | NNFLKDNYSLLEGNYPEK                   | F3  |
| ABC transporter permease                                                      | TFPETFM*EYWPSLIIGLK                  | F3  |
| ABC transporter, ATP-binding protein                                          | EKAVNLNNINMEYTLKK                    | F3  |
| ABC transporter ATP-binding protein                                           | ALATEPSLLLLDEPFSALDVVTAK             | F5  |
| ABC transporter permease                                                      | NMSFKSFYFFTLIGMAILYGTM*WGGR          | F5  |
| ABC transporter domain-containing protein                                     | MIIENINKDMDQRRVVLK                   | F5  |
| ABC transporter permease                                                      | WDSFSTPEFVGIQNFSR                    | F5  |



|                    |                                                 |                                   |     |
|--------------------|-------------------------------------------------|-----------------------------------|-----|
|                    | ABC transporter domain-containing protein       | GNAEKFALSMTLAR                    | F5  |
|                    | ABC transporter permease                        | TEENGQLEILKSLGIGAR                | F5  |
|                    | ABC transporter substrate-binding protein       | EYNVDGQVTAVNRGEADFAANDFGM*SEERS K | F7  |
|                    | ABC transporter ATP-binding/permease            | SNM*QWIWGYIK                      | F7  |
|                    | ABC transporter domain-containing protein       | DLAIMIGQEIVK                      | F9  |
|                    | ABC transporter permease                        | M*LFYENMLMGLLSLVIGIVIGSLLSKGFLK   | F9  |
|                    | ABC transporter domain-containing protein       | ILMLAEGRTVAYDTPENLK               | F9  |
|                    | ABC transporter ATP-binding protein             | GEIVLTGTVAELK                     | F10 |
|                    | ABC transporter permease                        | NRLPNYRVSFDFTPAK                  | F11 |
|                    | ABC transporter domain-containing protein       | VVTVVFFENFTAELETAIK               | F13 |
|                    | ABC transporter substrate-binding protein       | VVALLALSTLVGLGAC*GGNSAKSKTEDTK    | F13 |
|                    | Heme ABC transporter ATP-binding protein        | KAATPKEVVLSIK                     | F10 |
|                    | Thiol reductant ABC exporter subunit CydC       | EM*IEKLDPDGLQTM*VDEAGLR           | F14 |
|                    | ABC transporter domain-containing protein       | M*GM*FQRMSANDWQK                  | F14 |
|                    | ABC transporter                                 | IGLGATLLLALGGC*GTANSSSAKSDDSK     | F14 |
|                    | ABC transporter ATP-binding protein             | SQQLTAFMVTHDMEDAIRYGNRLIM*LHQGK   | F14 |
|                    | ABC transporter permease                        | KM*VWLM*LLASLIM*PFM*AFLLFNYR      | F15 |
|                    | ABC transporter domain-containing protein       | IQEVLLQIVSLTNTGKK                 | F15 |
|                    | ABC transporter ATPase                          | GLRYALYGFIADVVLIMAITLPSGAPLR      | F16 |
|                    | ABC transporter domain-containing protein       | MVSMVMAQVVGIDTGSNEPMLK            | F16 |
| Other transporters | Major facilitator superfamily (MFS) transporter | LILGIFLFILGFLIGC*LLK              | F2  |
|                    | Major facilitator superfamily (MFS) transporter | SKKSDSNNSLVK                      | F7  |
|                    | Major facilitator superfamily (MFS) transporter | KVM*NESQDAIALKEITQ                | F15 |
|                    | Multidrug resistance MFS transporter            | ENLGLAGSLNSFAR                    | F2  |

|  |                                                 |                          |    |
|--|-------------------------------------------------|--------------------------|----|
|  | Cation diffusion facilitator family transporter | KTKGSTAVIAALFANLLVAVSK   | F4 |
|  | EamA/RhaT family transporter                    | FIIAFVVLYGILKLAEEKK      | F5 |
|  | Copper-exporting P-type ATPase                  | IEKNYGVRGMTTC*ASC*SQTVEK | F2 |
|  | Copper-transporting ATPase CopB                 | KVDVIM*M*DK              | F2 |

M\* methionine oxidation; C\* carbamidomethylation of Cys.

**Table S6.** Peptides corresponding to other virulence factors, identified in the *Enterococcus* strains analyzed.

| Function                      | Protein                                               | Sequence                        | Strain |
|-------------------------------|-------------------------------------------------------|---------------------------------|--------|
| Alternative virulence factors | Transposase                                           | EMDSLALANAQLNLDK                | F5     |
|                               | Transposase                                           | EM*DSLALANAQLNLDK               | F15    |
|                               | Transposase                                           | LVEMSTPLDIAIPFKK                | F5     |
|                               | Tnp_DDE superfamily                                   | M*TIINATQYLKQLLSSELNRIGK        | F15    |
|                               | Tnp_DDE superfamily                                   | MTIINATQYLKQLLSSELNRIGK         | F16    |
|                               | Tnp_DDE superfamily                                   | M*FLLIFLLK                      | F2     |
|                               | IS4 family transposase                                | RAFSLDKLIM*DAGYK                | F5     |
|                               | Transposase InsI for insertion sequence element IS30C | SRFLLAGRILK                     | F2     |
|                               | IS30 family transposase                               | KDGLPKEM*DFNQVDQSFVYAVASLR      | F14    |
|                               | IS4 family transposase                                | QTIERIFSDEK                     | F13    |
|                               | IS6 family transposase                                | LIRVYGQPRSIVTDK                 | F13    |
|                               | Conjugative transposon protein                        | KVPM*IKVGTHK                    | F5     |
|                               | Conjugal transfer protein TraG                        | M*AINNEDVTDFKAQRNK              | F1     |
|                               | Mutator family transposase                            | QTVSKEAIYIAI                    | F3     |
|                               | Mutator family transposase                            | WIQVFDELK                       | F15    |
|                               | Mutator family transposase                            | EEAM*DQISFMIDK                  | F2     |
|                               | Integrase core domain protein                         | IESYYHQNIKIVK                   | F5     |
|                               | Integrase core domain protein                         | GYPYHNASLESWHGHLK               | F9     |
|                               | Tyrosine-type recombinase/integrase                   | AWKFFQAYLGINPETGKSVK            | F9     |
|                               | Recombinase family protein                            | EGRPKKFNQQQINLAM*NLLEDHSYK      | F9     |
|                               | Tyrosine-type recombinase/integrase                   | C*PFTNEPPC*LSC*NNGNPC*K         | F7     |
|                               | <i>Enterococcus faecalis</i> plasmid pPD1 bacI        | ETQKIADQLNSSGSQHNAGSYEFYDMAAMLK | F14    |
|                               | Putative plasmid replication protein                  | TVLWSGVLHLADK                   | F2     |
|                               | PrgI family protein                                   | M*AVEVKVPKDIK                   | F1     |
|                               | Pheromone response system RNA-binding regulator PrgU  | M*EAVVEREAKGM*K                 | F3     |

|                |                                                                                                                      |                                        |     |
|----------------|----------------------------------------------------------------------------------------------------------------------|----------------------------------------|-----|
|                | Regulatory protein RecX                                                                                              | GFSGDITNLVLANLELEIDEDLEKEALKK          | F13 |
|                | Regulatory protein RecX                                                                                              | TNVRLSDKGPK                            | F2  |
|                | CRISPR-associated endonuclease Cas9                                                                                  | QSVSINQKLLKEK                          | F3  |
|                | CRISPR-associated endonuclease Cas10                                                                                 | KYRAFFGDNSVNGYAGYIEGHATQEDFYK          | F9  |
|                | CRISPR-associated endonuclease Cas2                                                                                  | MSYRYMRM*ILM*FDM*PTETAEEER             | F16 |
|                | YqaJ domain-containing protein                                                                                       | KKGIGGSDVGILGLNK                       | F1  |
|                | Luciferase family oxidoreductase, group 1                                                                            | EAFPEDHLYSK                            | F1  |
| Phage proteins | HK97 family phage major capsid protein ( <i>Enterococcus</i> sp. 8G7_MSG3316 )                                       | AAAGTLTFAKNTIVSELAGVM*KK               | F3  |
|                | Phage capsid protein ( <i>Enterococcus casseliflavus</i> )                                                           | EAEERENEAAAR                           | F1  |
|                | Phage head protein gp7 ( <i>Enterococcus</i> phage phiFL2A and <i>Enterococcus faecalis</i> )                        | M*DEIMAYVDK                            | F3  |
|                | Minor head protein ( <i>Enterococcus casseliflavus</i> )                                                             | MNKEKIM*TDSFLGFDYR                     | F5  |
|                | Capsid protein ( <i>Enterococcus villorum</i> )                                                                      | EKDLEIAIEEAKTEEEQQVVEDEVNK             | F5  |
|                | Long-tail fiber protein gp35 ( <i>Enterococcus saccharolyticus</i> )                                                 | M*LLNISEKLM*AK                         | F13 |
|                | Phage tail protein ( <i>Enterococcus faecium</i> )                                                                   | LFMDDISQAMGEGADINLEF                   | F5  |
|                | Phage tail protein ( <i>Enterococcus faecium</i> )                                                                   | EMGITITNGRIEQNMDMFSESTRK               | F7  |
|                | Phage tail tape measure protein ( <i>Enterococcus avium</i> )                                                        | M*SSIGSTLTM*SVTAPIAAGFGAATK            | F2  |
|                | Phage tail tape measure protein TP901 ( <i>Enterococcus durans</i> )                                                 | GLAIASAIFGSM*SLLTGGLVVALGALIGALVVAY TK | F2  |
|                | Phage tail tape measure protein, TP901 family, core region ( <i>Enterococcus faecalis</i> )                          | WGTDVGKATDGALTK                        | F3  |
|                | Phage tail tape measure protein ( <i>Enterococcus avium</i> and <i>Enterococcus devriesei</i> )                      | GVQYM*NEYQDGVNTNAEK                    | F3  |
|                | Phage tail sheath ( <i>Enterococcus</i> phage 163 , <i>Enterococcus</i> phage vB_OCPT_Ben, <i>Enterococcus</i> phage | IVQDVTTYNDK                            | F3  |

|                                                                                                                                                                                                                                                                                                                                                                       |                                 |     |
|-----------------------------------------------------------------------------------------------------------------------------------------------------------------------------------------------------------------------------------------------------------------------------------------------------------------------------------------------------------------------|---------------------------------|-----|
| EfsSzw-1 , <i>Enterococcus</i> phage EFP01, <i>Enterococcus</i> phage EFDG1, <i>Enterococcus</i> phage PEF771, <i>Enterococcus</i> phage EfV12-phi1, <i>Enterococcus</i> phage 156 )                                                                                                                                                                                  |                                 |     |
| Phage tail tape measure protein ( <i>Enterococcus faecium</i> , <i>Enterococcus hirae</i> )                                                                                                                                                                                                                                                                           | IDMNNLMEASDVLSDIGDKLTELGK       | F1  |
| Phage tail tape measure protein, TP901 family, core region ( <i>Enterococcus hermanniensis</i> )                                                                                                                                                                                                                                                                      | EQTSEM*ITALGNLSEK               | F1  |
| Phage tail tape measure protein, TP901 family ( <i>Enterococcus faecalis</i> )                                                                                                                                                                                                                                                                                        | KTPTSPFSDPK                     | F5  |
| Phage tail tape measure protein ( <i>Enterococcus hirae</i> )                                                                                                                                                                                                                                                                                                         | VM*IEGIRSEQGQEQM*NHVMMDLQR      | F5  |
| Tail length tape-measure protein ( <i>Enterococcus</i> phage PBEF129, <i>Enterococcus</i> phage EFLK1, <i>Enterococcus</i> phage phiEF17H , <i>Enterococcus</i> phage phiEF24C, <i>Enterococcus</i> phage vB_EfaM_Ef2.3, <i>Enterococcus</i> phage vB_EfaH_EF1TV, <i>Enterococcus</i> phage ECP3, <i>Enterococcus</i> phage 156, <i>Enterococcus</i> phage phiM1EF22) | TRAENNAEESANLSIYSK              | F5  |
| HK97 gp10 family phage protein ( <i>Enterococcus faecalis</i> )                                                                                                                                                                                                                                                                                                       | RSETPSIKDDGMTGEVEAMADYSAYVEYGTR | F1  |
| Phage portal protein, HK97 family ( <i>Enterococcus faecalis</i> )                                                                                                                                                                                                                                                                                                    | EDGKDIKGAK                      | F5  |
| Putative phage portal protein, SPP1 family ( <i>Enterococcus faecalis</i> )                                                                                                                                                                                                                                                                                           | DLFLGNVSAKIKAPK                 | F3  |
| Phage portal protein <i>Enterococcus gallinarum</i>                                                                                                                                                                                                                                                                                                                   | ITAHVWKFAMAVNTILC*GNSYSR        | F3  |
| Phage portal protein ( <i>Enterococcus plantarum</i> )                                                                                                                                                                                                                                                                                                                | AGSQLHIM*KGITPEITDEGIK          | F5  |
| Phage/plasmid primase, P4 family domain protein <i>Enterococcus faecium</i>                                                                                                                                                                                                                                                                                           | DM*IVTSEVLAKELEIK               | F16 |
| PBSX family phage terminase, large subunit ( <i>Enterococcus faecalis</i> )                                                                                                                                                                                                                                                                                           | VNKSPM*KITYK                    | F15 |
| Phage terminase large subunit                                                                                                                                                                                                                                                                                                                                         | QFNTAYIEIAKKQGK                 | F3  |

|                                                                                                                                            |                                |     |
|--------------------------------------------------------------------------------------------------------------------------------------------|--------------------------------|-----|
| ( <i>Enterococcus cecorum</i> , <i>Enterococcus faecium</i> )                                                                              |                                |     |
| Phage integrase<br>( <i>Lactococcus garvieae</i> )                                                                                         | RTISRESLMLYR                   | F2  |
| Phage_integrase domain-containing protein<br>( <i>Enterococcus malodoratus</i> )                                                           | IANGAVEAM*VGK                  | F3  |
| Site-specific recombinase, phage integrase family ( <i>Enterococcus faecalis</i> )                                                         | AGEMIALTWSDIDFYNQTVR           | F3  |
| Phage integrase family protein<br>( <i>Enterococcus faecium</i> )                                                                          | VHQLTRVEIEAYLSELNMM*GIKPSTITGR | F5  |
| Cro/CI family transcriptional regulator ( <i>Enterococcus faecium</i> )                                                                    | NLNIGNNIKNIR                   | F13 |
| HTH cro/C1-type domain-containing protein ( <i>Enterococcus</i> sp.)                                                                       | M*LDSNVNMSYGGENLTEDEK          | F14 |
| HTH cro/C1-type domain-containing protein ( <i>Enterococcus rotai</i> )                                                                    | DYKALFLHC*AQNM*HDENK           | F15 |
| HTH cro/C1-type domain-containing protein ( <i>Enterococcus saccharolyticus</i> subsp. <i>saccharolyticus</i> )                            | FIVSEDEKDFENTVISGHYQLKK        | F16 |
| HTH cro/C1-type domain-containing protein<br>( <i>Enterococcus moraviensis</i> )                                                           | KKEYEEC*LYYLK                  | F1  |
| Cro/CI family transcriptional regulator<br>( <i>Enterococcus rotai</i> , <i>Enterococcus haemoperoxidus</i> , <i>Enterococcus caccae</i> ) | ETSINVADFQNK                   | F13 |
| XRE family transcriptional regulator<br>( <i>Enterococcus thailandicus</i> )                                                               | EGTKMSLGDKLK                   | F10 |
| XRE family transcriptional regulator<br>( <i>Enterococcus termitis</i> )                                                                   | DNIKQFLVDAK                    | F2  |
| XRE family transcriptional regulator<br>( <i>Enterococcus faecalis</i> )                                                                   | MSQDLAIEVRAALIRAGK             | F16 |
| BppU family phage baseplate upper protein ( <i>Enterococcus faecium</i> )                                                                  | LGDLKPVEGLTDVWSLTITPTK         | F2  |

|  |                                                                                                                                                                                                                 |                               |     |
|--|-----------------------------------------------------------------------------------------------------------------------------------------------------------------------------------------------------------------|-------------------------------|-----|
|  | BppU_N domain-containing protein ( <i>Enterococcus faecalis</i> )                                                                                                                                               | DEIPDLSGGIITFESEPAGGK         | F11 |
|  | phage infection protein YhgE/Pip domain-containing protein ( <i>Enterococcus asini</i> )                                                                                                                        | RIAKSPVAVFLIVALM*ILPSLYAWFNIK | F13 |
|  | Uncharacterized protein ( <i>Enterococcus</i> phage vB_EfaM_Ef2.3, <i>Enterococcus</i> phage phiEF24C, <i>Enterococcus</i> phage EFLK1, <i>Enterococcus</i> phage vB_EfaM_Ef2.1, <i>Enterococcus</i> phage 156) | YAQSMWKLANTIQQSGISR           | F16 |
|  | Uncharacterized protein ( <i>Enterococcus</i> phage LY0323, <i>Enterococcus</i> phage IME-EF4, <i>Enterococcus</i> phage vB_EfaS_AL2, <i>Enterococcus</i> phage Ec-ZZ2)                                         | GNSKSFDPM*RAGQHDDVVVIESTEK    | F15 |
|  | Uncharacterized protein ( <i>Enterococcus hirae</i> )                                                                                                                                                           | KTM*TAILAEMTKK                | F5  |
|  | Phage protein ( <i>Enterococcus</i> phage 156)                                                                                                                                                                  | KTNEEYLK                      | F3  |
|  | Uncharacterized protein gp54 ( <i>Enterococcus</i> phage phiFL3A, <i>Enterococcus casseliflavus</i> )                                                                                                           | LDEGIM*GLFVK                  | F2  |
|  | Membrane protein ( <i>Enterococcus</i> phage heks)                                                                                                                                                              | DQHAANM*M*LDAM*IK             | F3  |
|  | Phage-associated protein, HI1409 family ( <i>Enterococcus faecalis</i> )                                                                                                                                        | NDFM*LGNGK                    | F1  |

M\* methionine oxidation; C\* carbamidomethylation of Cys.

**Table S7.** Peptides corresponding to bacteriophage proteins, identified in the *Enterococcus* strains analyzed, that were determined as homologues to proteins found in different *Enterococcus* bacteriophages.

| Bacteriophage protein  | Bacteriophage                                                                                                                                                                                         | Peptide sequence | Strain |
|------------------------|-------------------------------------------------------------------------------------------------------------------------------------------------------------------------------------------------------|------------------|--------|
| Phage head protein gp7 | <i>Enterococcus</i> phage phiFL2A and <i>Enterococcus faecalis</i>                                                                                                                                    | M*DEIMAYVDK      | F3     |
| Phage tail sheath      | <i>Enterococcus</i> phage 163, <i>Enterococcus</i> phage vB_OCPT_Ben, <i>Enterococcus</i> phage EfsSzw-1, <i>Enterococcus</i> phage EFP01, <i>Enterococcus</i> phage EFDG1, <i>Enterococcus</i> phage | IVQDVTTYNDK      | F3     |

|                                  |                                                                                                                                                                                                                                                                                                                                  |                           |     |
|----------------------------------|----------------------------------------------------------------------------------------------------------------------------------------------------------------------------------------------------------------------------------------------------------------------------------------------------------------------------------|---------------------------|-----|
|                                  | PEf771, <i>Enterococcus</i> phage EfV12-phi1, <i>Enterococcus</i> phage 156                                                                                                                                                                                                                                                      |                           |     |
| Tail length tape-measure protein | <i>Enterococcus</i> phage PBEF129, <i>Enterococcus</i> phage EFLK1, <i>Enterococcus</i> phage phiEF17H, <i>Enterococcus</i> phage phiEF24C, <i>Enterococcus</i> phage vB_EfaM_Ef2.3, <i>Enterococcus</i> phage vB_EfaH_EF1TV, <i>Enterococcus</i> phage ECP3, <i>Enterococcus</i> phage 156, <i>Enterococcus</i> phage phiM1EF22 | TRAENNAEESANLSIYSK        | F5  |
| Uncharacterized protein          | <i>Enterococcus</i> phage vB_EfaM_Ef2.3, <i>Enterococcus</i> phage phiEF24C, <i>Enterococcus</i> phage EFLK1, <i>Enterococcus</i> phage vB_EfaM_Ef2.1, <i>Enterococcus</i> phage 156                                                                                                                                             | YAQSMWKLANTIQQSGISR       | F16 |
| Uncharacterized protein          | <i>Enterococcus</i> phage LY0323, <i>Enterococcus</i> phage IME-EF4, <i>Enterococcus</i> phage vB_EfaS_AL2, <i>Enterococcus</i> phage Ec-ZZ2                                                                                                                                                                                     | GNSKSFDPM*RAGQHDTVVIESTEK | F15 |
| Phage protein                    | Phage protein                                                                                                                                                                                                                                                                                                                    | KTNEEYLK                  | F3  |
| Uncharacterized protein gp54     | <i>Enterococcus</i> phage phiFL3A, <i>Enterococcus casseliflavus</i>                                                                                                                                                                                                                                                             | LDEGIM*GLFVK              | F2  |
| Membrane protein                 | <i>Enterococcus</i> phage heks                                                                                                                                                                                                                                                                                                   | DQHAANM*M*LDAM*IK         | F3  |

M\* methionine oxidation; C\* carbamidomethylation of Cys.
